# Supplementary material for: Metagenomic of Liver Tissue Identified at Least Two Genera of Totivirus-like Viruses in Molossus molossus Bats
Source: MDPI journal article supplement (doi:10.3390/microorganisms12010206), 2024-01-19
Supplement: s1 [file s1]

SUPPLEMENTARY MATERIAL:

**Metagenomic of liver tissue identified at least two genera of totivirus-like in *Molossus molossus* bats**

**Roseane da Silva Couto<sup>1,†</sup>, Endrya do Socorro Foro Ramos<sup>1,†</sup>, Wandercleyson Uchôa Abreu<sup>2,†</sup>, Luis Reginaldo Ribeiro Rodrigues<sup>3</sup>, Luis Fernando Marinho<sup>4</sup>, Vanessa dos Santos Moraes<sup>5</sup>, Fabiola Villanova<sup>1</sup>, Ramendra Pati Pandey<sup>6</sup>, Xutao Deng<sup>7</sup>, Eric Delwart<sup>8</sup>, Antonio Charlys da Costa<sup>5,‡</sup> and Elcio Leal<sup>1,\*‡</sup>**

<sup>1</sup> Laboratório de Diversidade Viral, Instituto de Ciências Biológicas, Universidade Federal do Pará, Belem 66075-000, Pará, Brazil; couto.roseane@gmail.com (R.S.C.); endrya.amos@gmail.com (E.d.S.F.R.); fvillanova@gmail.com (F.V.)

<sup>2</sup> Programa de Pos-Graduação REDE Bionorte, Polo Pará, Universidade Federal do Oeste do Pará, Santarém 68040-255, Pará, Brazil; uchua\_vet@yahoo.com.br (W.U.A.).

<sup>3</sup> Laboratory of Genetics & Biodiversity, Institute of Educational Sciences, Universidade Federal do Oeste do Pará, Santarém 68040-255, Pará, Brazil; luisreginaldo.ufpa@hotmail.com (L.R.R.R.).

<sup>4</sup> University of Amazonia, Santarém 68040-255, Pará, Brazil; fm8885785@gmail.com (L.F.M.).

<sup>5</sup> Laboratory of Virology (LIM 52), Instituto de Medicina Tropical, Universidade de São Paulo, São Paulo 05403-000, Brazil; va.moraes@usp.br (V.d.S.M.); charlysbr@yahoo.com.br (A.C.d.C.)

<sup>6</sup> School of Health Sciences & Technology UPES University, Dehradun, Uttarakhand, India Campus Energy Acres, PO Bidholi, Dehradun-248007; ramendra.pandey@gmail.com (R.P.P.).

<sup>7</sup> Vitalant Research Institute, San Francisco, CA 94143, USA; edelwart@vitalant.org (E.D.) xutaodeng@gmail.com (X.D.)

<sup>8</sup> Department Laboratory Medicine, University of California San Francisco, San Francisco, CA 94143, USA

\*Correspondence: elcioleal@gmail.com (E.L.)

†These authors contributed equally to this work.

‡ These authors jointly supervised this work.

FIGURES:

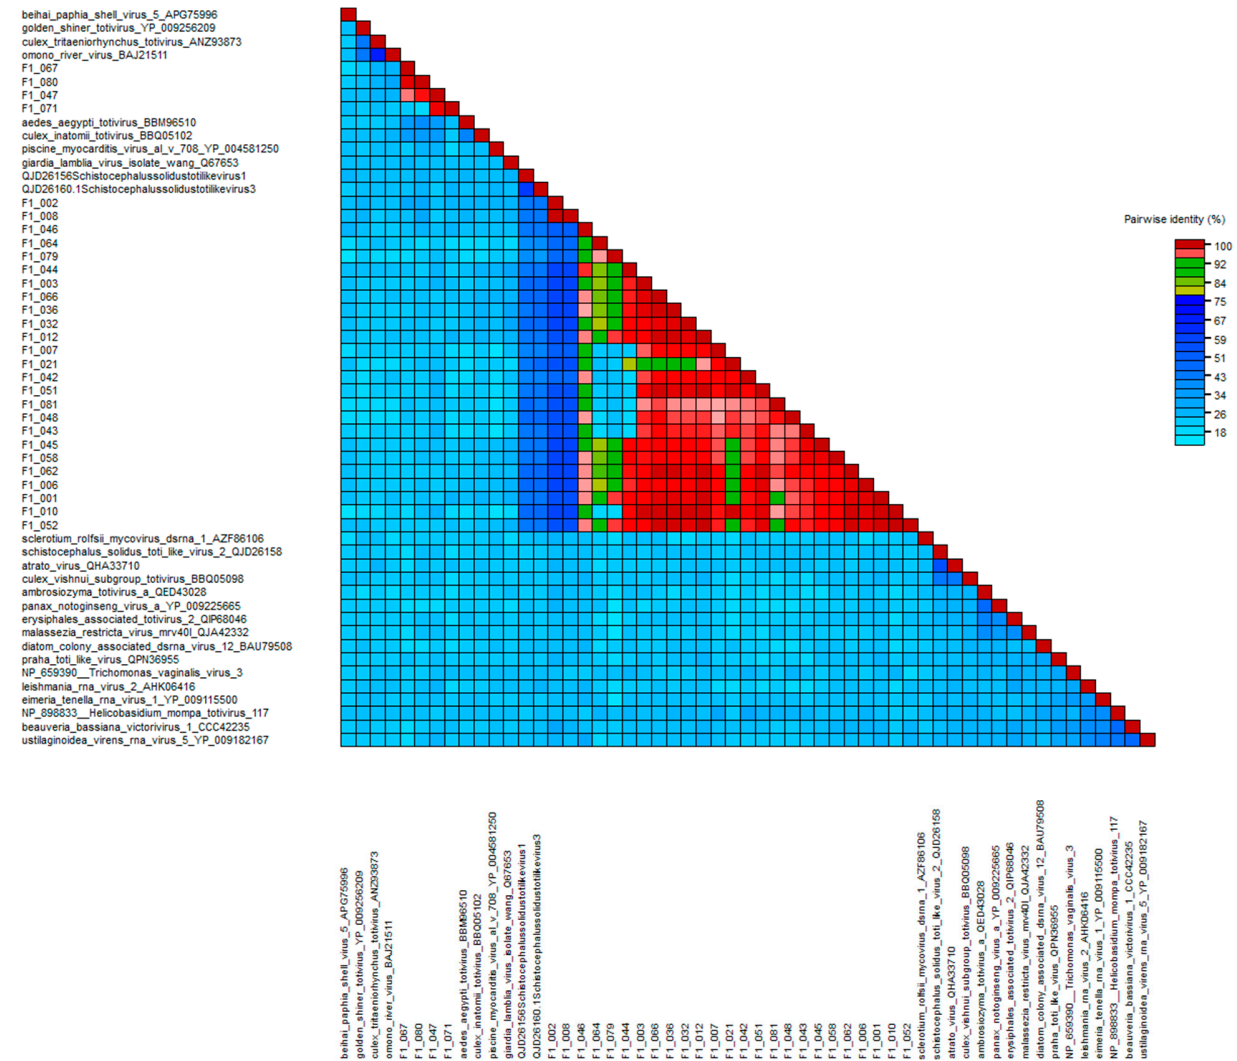

**Figure S1: Amino acid identity of RdRpol of totiviruses.** Pairwise identity of sequences generated in this study and some reference sequences of totiviruses. The colored scale indicates the percentage of identity.
